# Supplementary material
Source: PubMed Central journal article supplement (PMC2665040)
Supplement: supp_91_4_839__2.pdf [file supp_91_4_839__2.pdf]

# **TITLE: GAMMA INERT STERILIZATION: A SOLUTION TO POLYETHYLENE OXIDATION?**

## **ABSTRACT (TRADUCCION AL ESPAÑOL)**

### **Contexto:**

En la década de los 90, se comprobó que los componentes de polietileno de ultra alto peso molecular utilizados en reemplazos totales articulares se oxidaban tras ser irradiados con rayos gamma y posteriormente almacenados en aire durante periodos prolongados. Las compañías ortopédicas desarrollaron embalajes barrera para reducir la oxidación durante la esterilización radiativa y posterior almacenaje. Este estudio explora la hipótesis de que los componentes de polietileno esterilizados en atmósfera baja en oxígeno experimentan mecanismos de oxidación in vivo similares a los de componentes esterilizados en aire. Además, la potencial influencia de los diferentes procesos de esterilización en el rendimiento a desgaste de los componentes de polietileno fue examinada.

### **Métodos:**

Se realizaron análisis de la oxidación, desgaste, y daño superficial en cuarenta y ocho revestimientos acetabulares y 123 insertos tibiales. El tiempo de implantación promedio de los treinta y un revestimientos acetabulares que fueron esterilizados con radiación gamma en aire fue de  $12.3 \pm 3.7$  años, mientras que para los diecisiete que fueron esterilizados en gas inerte fue de  $4.0 \pm 2.5$  años. El tiempo de implantación promedio de veintiséis insertos tibiales que fueron esterilizados en aire fue de  $11.0 \pm 3.2$  años, mientras que para los noventa y siete esterilizados en gas inerte fue de  $2.8 \pm 2.2$  años. Los niveles de oxidación y hidroperóxidos fueron caracterizados tanto en regiones de los insertos expuestas a carga como en aquellas que no lo estuvieron.

### **Results:**

Se observaron niveles detectables de oxidación y de potencial de oxidación en todos los grupos. Los niveles de oxidación y de hidroperóxidos fueron regionales. Aquellas superficies con acceso a los fluidos corporales se oxidaron mucho más que las protegidas superficies articulares. Esta variación pareció ser mayor en los componentes históricos (esterilizados con radiación gamma en aire). En cuanto al rendimiento a desgaste, tanto los revestimientos acetabulares históricos como los convencionales mostraron tasas de penetración por desgaste similares, mientras que una baja incidencia de delaminación fue confirmada para los insertos tibiales convencionales en la primera década de implantación.

### **Conclusiones:**

Este estudio explora el impacto de los cambios introducidos por la industria en las prácticas de esterilización del polietileno. Nosotros hallamos oxidación y potencial de oxidación más bajos en los revestimientos acetabulares convencionales que habían sido esterilizados con radiación gamma en gas inerte en comparación con los que habían sido esterilizados en aire. Sin embargo, también encontramos fuerte evidencia de que los componentes convencionales experimentan mecanismos de oxidación in vivo similares a los observados tras irradiación gamma en aire. Además, la esterilización mediante radiación gamma en gas inerte no impartió una mejora significativa en resistencia a desgaste en comparación con esterilización por rayos gamma en aire, con la excepción de una más baja incidencia de delaminación en la primera década de implantación para los insertos tibiales.

### **Relevancia Clínica:**

Nuestra investigación demuestra que la esterilización por radiación gamma en gas inerte puede haber mejorado, pero no resuelto completamente, el problema de la oxidación del polietileno en las artroplastias de cadera y rodilla.
